# Supplementary material for: Oligodendrocyte pathology in fetal alcohol spectrum disorders
Source: PubMed Central journal article supplement — Neural Regen Res. 2021 Aug 4;17(3):497–502. doi: 10.4103/1673-5374.314294 (PMC8504395; doi:10.4103/1673-5374.314294), 2021-08-04
Supplement: NRR-17-497_Suppl1.pdf [file NRR-17-497_Suppl1.pdf]

## OPEN PEER REVIEW REPORT 1

**Name of journal:** Neural Regeneration Research

**Manuscript NO:** NRR-D-21-00140

**Title:** Oligodendrocyte Pathology in the Developing Brain in Fetal Alcohol Syndrome

**Reviewer's Name:** C. Fernando Valenzuela

**Reviewer's country:** USA

### COMMENTS TO AUTHORS

This is a well-written and concise review of the effects of prenatal ethanol exposure on oligodendrocyte development. The topic is important and the review is timely. There are only a few suggestions for the authors' consideration:

1. It is suggested that the title be changed to: "Oligodendrocyte Pathology in Fetal Alcohol Spectrum Disorders" or "Effects of Ethanol on Oligodendrocyte Development: Implications for Fetal Alcohol Spectrum Disorders". A brief introductory paragraph could be added at the beginning of the article in which the scope of the review is clearly defined.
2. For all the animal studies discussed in the review, please clearly state the details of the different ethanol exposure paradigms (route of administration, timing of exposure, species, dose, and peak blood ethanol concentrations). Compare and contrast this information with that of the human studies (e.g., Darbinian 2021). This information could be presented in a table.
3. Page 2, line 25. There animals exposed at PD16 or samples collected at this time?
4. The impact of the review would be increased if additional key studies are discussed: PMID: 31919968, PMID: 31414368, PMID: 31009095, PMID: 30889291, PMID: 28669901, PMID: 27311608, PMID: 25703384, PMID: 21279438.
